# Supplementary material
Source: publisher site journal article supplement (https://www.spandidos-publications.com/4223/downloadSupplementary)
Supplement: Supplementary file 1 [file downloadSupplementary]

## Sheet: sheet1
Table SIII. Correlations between biochemical indicators and OTUs.
	Sex	Age	CR	eGFR	SBP	DBP	Pro_24h
OTU13	0.148998	0.0426377	0.341995	-0.262277	0.416551	-0.0669384	0.56514
OTU31	0.0570631	-0.104295	0.147454	-0.104383	0.372773	0.0123161	0.502594
OTU38	0.0910177	0.209313	0.44717	-0.491407	0.477007	-0.0739171	0.569223
OTU26	0.00620238	0.195601	0.324416	-0.417964	0.541137	0.1473	0.605327
OTU8	-0.0182519	0.127755	0.287455	-0.385178	0.44953	0.0402618	0.584035
OTU22	0.00634034	0.165604	0.314313	-0.381671	0.456292	0.0305467	0.564446
OTU21	-0.0559632	-0.141436	-0.327954	0.346207	-0.317357	0.0562582	-0.593287
OTU11	-0.0615634	-0.205341	-0.399255	0.484377	-0.280577	-0.00479085	-0.636757
OTU7	-0.00279834	-0.172071	-0.265413	0.351995	-0.350552	-0.161783	-0.534557
OTU19	0.0727521	-0.241671	-0.319237	0.478703	-0.417859	-0.12222	-0.721858
OTU9	-0.207064	-0.148324	-0.427532	0.357494	-0.436289	0.1716	-0.533174
OTU33	-0.016789	-0.0473504	-0.346617	0.377613	-0.539863	0.0708755	-0.580529
OTU28	-0.0559632	-0.122865	-0.424094	0.487536	-0.373997	-0.020022	-0.719404
OTU5	-0.218256	-0.123726	-0.470629	0.416135	-0.502021	0.0577322	-0.725047
OTU15	-0.128715	-0.0671514	-0.42041	0.418098	-0.457421	-0.0368503	-0.687016
OTU4	-0.0671558	-0.0559595	-0.226658	0.216901	-0.300279	-0.0325511	-0.360193
OTU30	-0.016789	-0.194321	-0.260669	0.338846	-0.313302	-0.0762802	-0.485082
OTU16	-0.016789	-0.0927329	-0.295417	0.358721	-0.312811	-0.0555212	-0.461282
OTU10	-0.195871	-0.0764985	-0.332866	0.244381	-0.347213	0.0955652	-0.470115
OTU6	-0.218256	0.0424309	-0.349073	0.22647	-0.504601	0.143593	-0.556728
OTU23	-0.134312	-0.0121758	-0.340601	0.277751	-0.501898	0.110182	-0.479684
OTU17	-0.16789	-0.0554676	-0.355581	0.275297	-0.45263	-0.101707	-0.514281
OTU12	-0.153909	-0.103747	-0.347622	0.319115	-0.482393	0.133837	-0.529649
OTU1	-0.0391742	0.0640767	-0.221378	0.228924	-0.541829	0.0994959	-0.558201
OTU2	-0.0503669	-0.061371	-0.3185	0.32118	-0.574756	-0.0233385	-0.606782
OTU3	-0.117523	-0.0873215	-0.273439	0.216655	-0.45607	0.0773857	-0.462754
OTU14	-0.128715	-0.00381263	-0.308555	0.224752	-0.436903	0.134135	-0.489744
OTU54	-0.0895411	0.00947007	-0.28277	0.276769	-0.385055	-0.0230929	-0.587889
OTU40	0.016789	0.00344366	-0.22408	0.287565	-0.445626	-0.0233385	-0.560409
OTU18	-0.0671558	-0.121758	-0.255021	0.269163	-0.41405	-0.0530645	-0.518942
